# Supplementary material for: Real-World Tocilizumab Use in Patients with Rheumatoid Arthritis in Canada: 12-Month Results From an Observational, Noninterventional Study
Source: Springer Nature journal article supplement (doi:10.1007/s40744-018-0130-6), 2018-10-28

## Supplementary Materials

**Supplementary Table S1** Baseline characteristics of patients whose primary and secondary tocilizumab treatment failed due to efficacy reasons and patients who remained on tocilizumab at month 12

| <b>Parameter</b>                   | <b>Primary treatment<br/>failed<sup>a</sup><br/>n = 9</b> | <b>Secondary<br/>treatment failed<sup>b</sup><br/>n = 4</b> | <b>Patients receiving<br/>tocilizumab at<br/>month 12<br/>N = 93</b> |
|------------------------------------|-----------------------------------------------------------|-------------------------------------------------------------|----------------------------------------------------------------------|
| Age, years                         | 51.8 (14.5)                                               | 61.9 (10.7)                                                 | 55.0 (13.7)                                                          |
| Female, n (%)                      | 7 (77.8)                                                  | 3 (75.0)                                                    | 79 (84.9)                                                            |
| Anti-CCP positive, n (%)           | 2 (22.2)                                                  | 1 (25.0)                                                    | 28 (30.1)                                                            |
| Previous RA-related surgery, n (%) | 4 (44.4)                                                  | 2 (50.0)                                                    | 16 (17.2)                                                            |
| RF positive, n (%)                 | 4 (66.7)                                                  | 3 (100.0)                                                   | 50 (63.3)                                                            |
| Structural joint damage, n (%)     | 7 (77.8)                                                  | 4 (100.0)                                                   | 44 (47.3)                                                            |
| Disease duration, years            | 13.3 (10.1)                                               | 23.5 (19.0)                                                 | 11.3 (9.4)                                                           |
| Morning stiffness VAS, mm          | 57.7 (16.7)                                               | 56.3 (30.5)                                                 | 59.4 (23.2)                                                          |
| Pain VAS, mm                       | 67.3 (11.5)                                               | 73.0 (26.4)                                                 | 61.1 (23.8)                                                          |
| Fatigue VAS, mm                    | 62.7 (20.1)                                               | 79.3 (19.1)                                                 | 61.8 (24.4)                                                          |
| PtGA VAS, mm                       | 57.4 (24.9)                                               | 70.8 (14.5)                                                 | 63.0 (20.7)                                                          |
| PGA VAS, mm                        | 57.2 (13.1)                                               | 54.0 (30.5)                                                 | 64.8 (23.3)                                                          |
| CRP, mg/L                          | 6.3 (4.8)                                                 | 3.6 (1.5)                                                   | 19.6 (31.1)                                                          |
| ESR, mm/h                          | 26.1 (12.1)                                               | 22.3 (14.4)                                                 | 26.1 (19.7)                                                          |
| TJC28                              | 15.3 (7.7)                                                | 11.8 (3.8)                                                  | 12.5 (7.4)                                                           |
| SJC28                              | 9.0 (6.3)                                                 | 12.0 (6.2)                                                  | 11.4 (6.1)                                                           |

|       |             |            |             |
|-------|-------------|------------|-------------|
| DAS28 | 5.8 (0.9)   | 5.6 (0.8)  | 5.5 (1.2)   |
| SDAI  | 34.7 (12.2) | 35.1 (6.1) | 35.9 (14.1) |
| CDAI  | 34.4 (11.6) | 33.0 (6.0) | 34.8 (13.5) |

---

Data are mean (SD) unless otherwise stated.

<sup>a</sup>Patients whose primary treatment failed discontinued tocilizumab between baseline and month 6 because of efficacy reasons.

<sup>b</sup>Patients whose secondary treatment failed discontinued tocilizumab between months 6 and 12 because of efficacy reasons.

CCP, cyclic citrullinated peptide; CDAI, Clinical Disease Activity Index; CRP, C-reactive protein; DAS, Disease Activity Score based on 28 joints; ESR, erythrocyte sedimentation rate; PGA, Physician Global Assessment of disease activity; PtGA, Patient Global Assessment of disease activity; RA, rheumatoid arthritis; RF, rheumatoid factor; SDAI, Simplified Disease Activity Index; SJC28, swollen joint count based on 28 joints; TJC28, tender joint count based on 28 joints; VAS, visual analog scale.

**Supplementary Table S2** Serious adverse events according to system organ class and preferred term (all tocilizumab-treated patients; N = 198)

| <b>System organ class</b><br><b>Preferred term</b> | <b>Number of events (rate/100 PY)</b> |
|----------------------------------------------------|---------------------------------------|
| Infections and infestations                        | 8 (4.23)                              |
| Pneumonia                                          | 2 (1.06)                              |
| Cellulitis                                         | 1 (0.53)                              |
| Cystitis                                           | 1 (0.53)                              |
| Postoperative wound infection                      | 1 (0.53)                              |
| Pyelonephritis                                     | 1 (0.53)                              |
| Subcutaneous abscess                               | 1 (0.53)                              |
| Urosepsis                                          | 1 (0.53)                              |
| Injury, poisoning, and procedural complications    | 7 (3.70)                              |
| Fall                                               | 3 (1.59)                              |
| Hip fracture                                       | 2 (1.06)                              |
| Fat embolism                                       | 1 (0.53)                              |
| Lumbar vertical fracture                           | 1 (0.53)                              |
| Cardiac disorders                                  | 4 (2.12)                              |
| Acute myocardial infarction                        | 1 (0.53)                              |
| Chest discomfort                                   | 1 (0.53)                              |
| Myocardial infarction                              | 1 (0.53)                              |
| Stress cardiomyopathy                              | 1 (0.53)                              |
| Musculoskeletal and connective tissue disorders    | 4 (2.12)                              |
| Arthralgia                                         | 2 (1.06)                              |

|                                                      |          |
|------------------------------------------------------|----------|
| Back pain                                            | 1 (0.53) |
| Joint instability                                    | 1 (0.53) |
| Gastrointestinal disorders                           | 2 (1.06) |
| Small intestinal obstruction                         | 1 (0.53) |
| Vomiting                                             | 1 (0.53) |
| Immune system disorders                              | 2 (1.06) |
| Anaphylactic reaction                                | 2 (1.06) |
| Neoplasms; benign, malignant, and unspecified        | 2 (1.06) |
| Lung adenocarcinoma                                  | 2 (1.06) |
| Psychiatric disorders                                | 2 (1.06) |
| Delerium                                             | 1 (0.53) |
| Depression                                           | 1 (0.53) |
| Renal and urinary disorders                          | 2 (1.06) |
| Bladder prolapse                                     | 1 (0.53) |
| Nephrolithiasis                                      | 1 (0.53) |
| Vascular disorders                                   | 2 (1.06) |
| Hypersensitivity vasculitis                          | 1 (0.53) |
| Obstructive shock                                    | 1 (0.53) |
| Blood and lymphatic system disorders                 | 1 (0.53) |
| Neutropenia                                          | 1 (0.53) |
| General disorders and administration site conditions | 1 (0.53) |
| Mass                                                 | 1 (0.53) |
| Hepatobiliary disorders                              | 1 (0.53) |
| Drug-induced liver injury                            | 1 (0.53) |
| Pregnancy, puerperium, and perinatal conditions      | 1 (0.53) |

|                                                  |          |
|--------------------------------------------------|----------|
| Pregnancy                                        | 1 (0.53) |
| Reproductive system and breast disorders         | 1 (0.53) |
| Menorrhagia                                      | 1 (0.53) |
| Respiratory, thoracic, and mediastinal disorders | 1 (0.53) |
| Chronic obstructive pulmonary disease            | 1 (0.53) |
| Skin and subcutaneous tissue disorders           | 1 (0.53) |
| Petechiae                                        | 1 (0.53) |
| Surgical and medical prodedures                  | 1 (0.53) |
| Knee arthroplasty                                | 1 (0.53) |

**Supplementary Fig. S1** Lipid profile over time (safety population, n = 198). HDL-C: high-density lipoprotein-cholesterol; LDL-C: low-density lipoprotein-cholesterol.

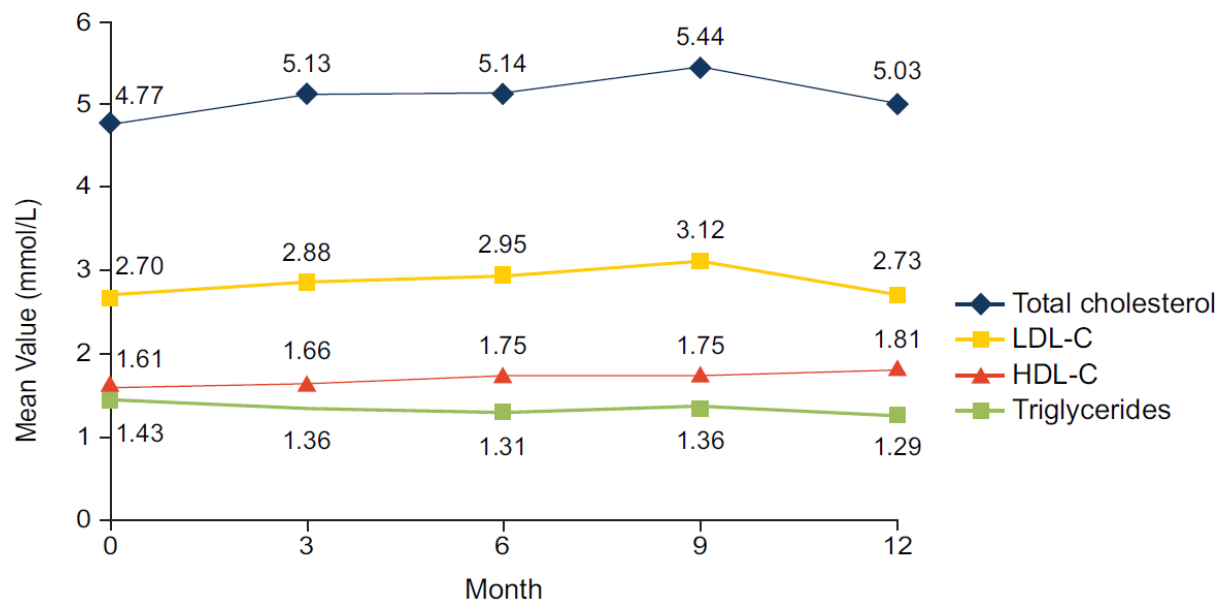

Supplement: MOESM1 [file 24439430]
